# Supplementary material for: In Situ Photopolymerization of Acrylamide Hydrogel to Coat Cellulose Acetate Nanofibers for Drug Delivery System
Source: MDPI journal article supplement (doi:10.3390/polym13111863), 2021-06-03
Supplement: s1 [file s1]

## Supporting information

### **In situ Photopolymerization of Acrylamide Hydrogel to Coat Cellulose Acetate Nanofibers for Drug Delivery System**

Mohamed F. Attia<sup>1,2\*</sup>, Ahmed Saad<sup>3\*</sup>, Md Arifuzzaman<sup>1</sup>, Megan Pitz<sup>4</sup>, Khoulood Jlassi<sup>5</sup>, Angela Alexander-Bryant<sup>4</sup>, Stephen S Kelly<sup>6</sup>, Frank Alexis<sup>7</sup>, Daniel C. Whitehead<sup>1\*</sup>

<sup>1</sup> Department of Chemistry, Clemson University, Clemson, SC 29634, USA

<sup>2</sup> Center for Nanotechnology in Drug Delivery and Division of Pharmacoengineering and Molecular Pharmaceutics, Eshelman School of Pharmacy, University of North Carolina at Chapel Hill, NC 27599, USA

<sup>3</sup> Pretreatment and Finishing Department, Textile Research Division, National Research Center, Dokki, 12622 Cairo, Egypt

<sup>4</sup> Department of Bioengineering, Clemson University, Clemson, SC 29634, USA

<sup>5</sup> Center for Advanced Materials, Qatar University, P. O. Box 2713, Doha, Qatar

<sup>6</sup> Department of Forest Biomaterials, College of Natural Resources, North Carolina State University, Raleigh, NC 27695-8005, USA

<sup>7</sup> School of Biological Sciences and Engineering, Yachay Tech University, 100650-Urcuquí, Ecuador

Submitted to: *Polymers – “a special issue Polymers for Biomedical Imaging and Therapy”*

\* Corresponding authors:

Mohamed F. Attia: [mattia@email.unc.edu](mailto:mattia@email.unc.edu) and [mattianrc@gmail.com](mailto:mattianrc@gmail.com)

Daniel C. Whitehead: [dwhiteh@clemson.edu](mailto:dwhiteh@clemson.edu)

Ahmed S. Montaser: [abohabbiba2012@gmail.com](mailto:abohabbiba2012@gmail.com) and [amontas@ncsu.edu](mailto:amontas@ncsu.edu)

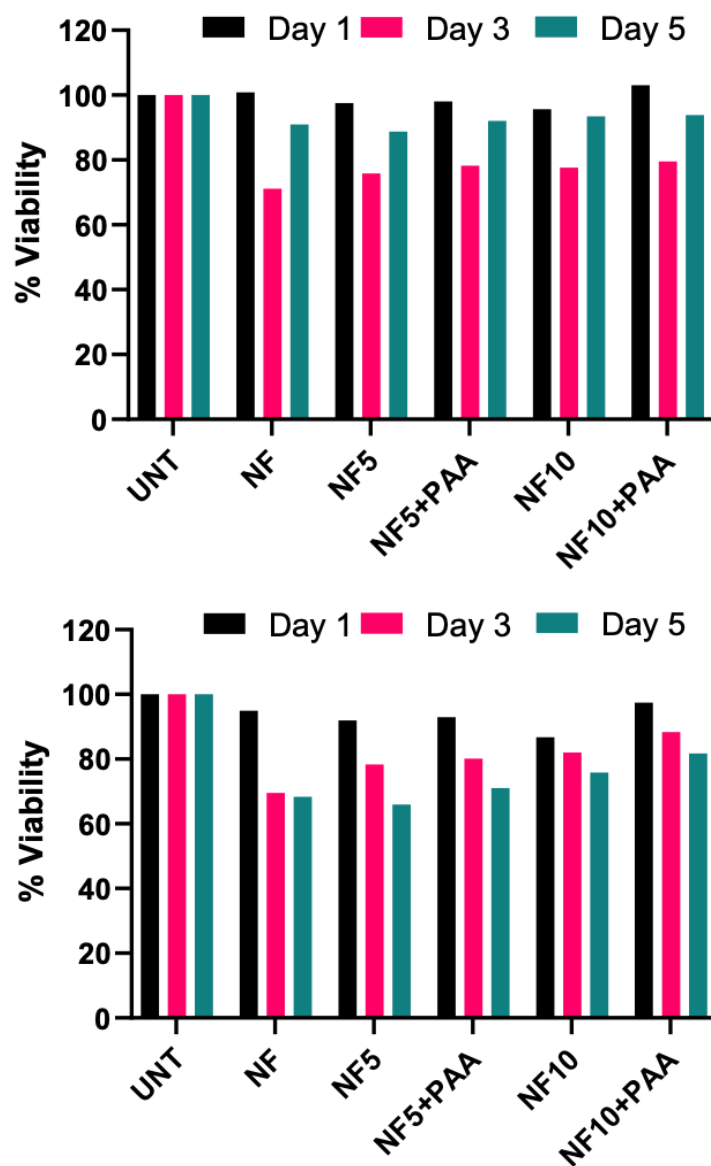

**Figure S1.** Cytotoxicity assays of the electrospun CANFs. Top: 4 mg/mL; Bottom: 8 mg/mL. UNT denotes untreated 3T3 adipose cells, NF denotes unmodified CANF, NF5 denotes 5 wt. % Ib-loaded CANF, NF5+PAA denotes 5 wt. % Ib-loaded CANF coated with poly-AAm polymer, NF10 denotes 10 wt. % Ib-loaded CANF, and NF10+PAA denotes 10 wt. % Ib-loaded CANF coated with poly-AAm polymer.
